# Supplementary material for: Physicochemical Properties of a New PEGylated Polybenzofulvene Brush for Drug Encapsulation
Source: Pharmaceutics. 2019 Sep 1;11(9):444. doi: 10.3390/pharmaceutics11090444 (PMC6781277; doi:10.3390/pharmaceutics11090444)
Supplement: Supplementary file 1 [file pharmaceutics-11-00444-s001.zip › vc1725.cif.txt]

data_VC1725
 
_audit_creation_method            'SHELXL-2018/1'
_shelx_SHELXL_version_number      '2018/1'


_chemical_name_systematic         'Ethyl 6-ethynyl-1-oxo-3-phenyl-1H-indene-2-carboxylate' 
_chemical_formula_moiety          'C20 H14 O3' 
_chemical_formula_sum             'C20 H14 O3' 
_chemical_formula_weight          302.31

loop_
 _atom_type_symbol
 _atom_type_description
 _atom_type_scat_dispersion_real
 _atom_type_scat_dispersion_imag
 _atom_type_scat_source
 'C'  'C'   0.0033   0.0016
 'International Tables Vol C Tables 4.2.6.8 and 6.1.1.4'
 'H'  'H'   0.0000   0.0000
 'International Tables Vol C Tables 4.2.6.8 and 6.1.1.4'
 'O'  'O'   0.0106   0.0060
 'International Tables Vol C Tables 4.2.6.8 and 6.1.1.4'
 
_space_group_crystal_system       triclinic
_space_group_IT_number            2
_space_group_name_H-M_alt         'P -1'
_space_group_name_Hall            '-P 1'
 
_shelx_space_group_comment
;
The symmetry employed for this shelxl refinement is uniquely defined
by the following loop, which should always be used as a source of
symmetry information in preference to the above space-group names.
They are only intended as comments.
;
 
loop_
 _space_group_symop_operation_xyz
 'x, y, z'
 '-x, -y, -z'
 
_cell_length_a                    7.6041(14)
_cell_length_b                    8.8275(17)
_cell_length_c                    12.4560(17)
_cell_angle_alpha                 96.490(13)
_cell_angle_beta                  95.807(13)
_cell_angle_gamma                 112.075(18)
_cell_volume                      760.4(2)
_cell_formula_units_Z             2
_cell_measurement_temperature     293(2)
_cell_measurement_reflns_used     1601
_cell_measurement_theta_min       2.5188
_cell_measurement_theta_max       29.0196 
_exptl_crystal_description        'prism'
_exptl_crystal_colour             'red-orange'
_exptl_crystal_density_diffrn     1.320          
_exptl_crystal_F_000              316
_exptl_crystal_size_max           0.5
_exptl_crystal_size_mid           0.4
_exptl_crystal_size_min           0.4
_exptl_absorpt_coefficient_mu     0.088
_exptl_absorpt_correction_T_min   0.73261
_exptl_absorpt_correction_T_max   1.00000
_exptl_absorpt_correction_type    'multi-scan'
_exptl_absorpt_process_details
;
CrysAlisPro, Agilent Technologies,
Version 1.171.36.21 (release 14-08-2012 CrysAlis171 .NET)
(compiled Sep 14 2012,17:21:16)
Empirical absorption correction using spherical harmonics,
 implemented in SCALE3 ABSPACK scaling algorithm.
;

_diffrn_ambient_temperature       293(2)
_diffrn_radiation_wavelength      0.71073
_diffrn_radiation_type            MoK\a
_diffrn_radiation_source          'Enhance (Mo) X-ray Source'
_diffrn_radiation_monochromator   'graphite'
_diffrn_measurement_device_type   'Xcalibur, Sapphire3'
_diffrn_measurement_method        '\w scans'
_diffrn_detector_area_resol_mean  16.0827
_diffrn_reflns_number             5771
_diffrn_reflns_av_unetI/netI      0.0581
_diffrn_reflns_av_R_equivalents   0.0336
_diffrn_reflns_limit_h_min        -9
_diffrn_reflns_limit_h_max        10
_diffrn_reflns_limit_k_min        -10
_diffrn_reflns_limit_k_max        11
_diffrn_reflns_limit_l_min        -16
_diffrn_reflns_limit_l_max        16
_diffrn_reflns_theta_min          2.524
_diffrn_reflns_theta_max          29.084
_diffrn_reflns_theta_full         25.242
_diffrn_measured_fraction_theta_max   0.843
_diffrn_measured_fraction_theta_full  0.998
_diffrn_reflns_Laue_measured_fraction_max    0.843
_diffrn_reflns_Laue_measured_fraction_full   0.998
_diffrn_reflns_point_group_measured_fraction_max   0.843
_diffrn_reflns_point_group_measured_fraction_full  0.998
_reflns_number_total              3438
_reflns_number_gt                 2303
_reflns_threshold_expression      'I > 2\s(I)'
_reflns_Friedel_coverage          0.000
_reflns_Friedel_fraction_max      .
_reflns_Friedel_fraction_full     .
 
_reflns_special_details
;
 Reflections were merged by SHELXL according to the crystal
 class for the calculation of statistics and refinement.
 
 _reflns_Friedel_fraction is defined as the number of unique
 Friedel pairs measured divided by the number that would be
 possible theoretically, ignoring centric projections and
 systematic absences.
;
 


_computing_data_collection
;
CrysAlisPro, Oxford Diffraction Ltd.,
Version 1.171.33.42 (release 29-05-2009 CrysAlis171 .NET)
(compiled May 29 2009,17:40:42)
;
_computing_cell_refinement
;
CrysAlisPro, Oxford Diffraction Ltd.,
Version 1.171.33.42 (release 29-05-2009 CrysAlis171 .NET)
(compiled May 29 2009,17:40:42)
;
_computing_data_reduction
;
CrysAlisPro, Oxford Diffraction Ltd.,
Version 1.171.33.42 (release 29-05-2009 CrysAlis171 .NET)
(compiled May 29 2009,17:40:42)
;
_computing_structure_refinement   'SHELXL-2018/1 (Sheldrick, 2018)'
_computing_molecular_graphics     'Ortep-3 for Windows (Farrugia, 1997)'
_computing_publication_material   'WinGX publication routines (Farrugia, 1999)'

_refine_ls_structure_factor_coef  Fsqd
_refine_ls_matrix_type            full
_refine_ls_weighting_scheme       calc
_refine_ls_weighting_details
'w=1/[\s^2^(Fo^2^)+(0.0498P)^2^] where P=(Fo^2^+2Fc^2^)/3'
_atom_sites_solution_primary      ?
_atom_sites_solution_secondary    ?
_atom_sites_solution_hydrogens    geom
_refine_ls_hydrogen_treatment     constr
_refine_ls_extinction_method      none
_refine_ls_extinction_coef        .
_refine_ls_number_reflns          3438
_refine_ls_number_parameters      209
_refine_ls_number_restraints      0
_refine_ls_R_factor_all           0.0822
_refine_ls_R_factor_gt            0.0519
_refine_ls_wR_factor_ref          0.1292
_refine_ls_wR_factor_gt           0.1102
_refine_ls_goodness_of_fit_ref    1.032
_refine_ls_restrained_S_all       1.032
_refine_ls_shift/su_max           0.000
_refine_ls_shift/su_mean          0.000
 
loop_
 _atom_site_label
 _atom_site_type_symbol
 _atom_site_fract_x
 _atom_site_fract_y
 _atom_site_fract_z
 _atom_site_U_iso_or_equiv
 _atom_site_adp_type
 _atom_site_occupancy
 _atom_site_site_symmetry_order  
 _atom_site_calc_flag
 _atom_site_refinement_flags_posn
 _atom_site_refinement_flags_adp
 _atom_site_refinement_flags_occupancy
 _atom_site_disorder_assembly
 _atom_site_disorder_group
C1 C 0.4666(3) 0.5247(2) 0.83609(13) 0.0385(4) Uani 1 1 d . . . . .
O1 O 0.57042(19) 0.67054(14) 0.86422(10) 0.0511(4) Uani 1 1 d . . . . .
C2 C 0.2733(2) 0.4538(2) 0.76813(13) 0.0380(4) Uani 1 1 d . . . . .
C3 C 0.2061(2) 0.2856(2) 0.75228(12) 0.0359(4) Uani 1 1 d . . . . .
C4 C 0.3515(3) 0.2359(2) 0.81025(13) 0.0377(4) Uani 1 1 d . . . . .
C5 C 0.3563(3) 0.0820(2) 0.81520(13) 0.0433(4) Uani 1 1 d . . . . .
H5 H 0.252977 -0.014009 0.781421 0.052 Uiso 1 1 calc R U . . .
C6 C 0.5183(3) 0.0737(2) 0.87156(14) 0.0446(5) Uani 1 1 d . . . . .
H6 H 0.522677 -0.029379 0.875813 0.053 Uiso 1 1 calc R U . . .
C7 C 0.6742(3) 0.2161(2) 0.92184(13) 0.0414(4) Uani 1 1 d . . . . .
C8 C 0.6680(3) 0.3718(2) 0.91609(13) 0.0417(4) Uani 1 1 d . . . . .
H8 H 0.771050 0.468391 0.949378 0.050 Uiso 1 1 calc R U . . .
C9 C 0.5086(3) 0.37886(19) 0.86098(13) 0.0379(4) Uani 1 1 d . . . . .
C10 C 0.1817(3) 0.5605(2) 0.72600(14) 0.0410(4) Uani 1 1 d . . . . .
O2 O 0.2667(2) 0.68538(18) 0.69254(13) 0.0776(5) Uani 1 1 d . . . . .
O3 O -0.00362(18) 0.50325(15) 0.73068(11) 0.0538(4) Uani 1 1 d . . . . .
C11 C -0.1140(3) 0.5920(2) 0.68814(17) 0.0575(5) Uani 1 1 d . . . . .
H11A H -0.035618 0.677410 0.650609 0.069 Uiso 1 1 calc R U . . .
H11B H -0.154920 0.644676 0.747712 0.069 Uiso 1 1 calc R U . . .
C12 C -0.2846(3) 0.4726(3) 0.61088(17) 0.0713(7) Uani 1 1 d . . . . .
H12A H -0.243701 0.434156 0.546590 0.107 Uiso 1 1 calc R U . . .
H12B H -0.368778 0.526447 0.590731 0.107 Uiso 1 1 calc R U . . .
H12C H -0.351466 0.380161 0.645429 0.107 Uiso 1 1 calc R U . . .
C13 C 0.0279(2) 0.16714(19) 0.68467(13) 0.0364(4) Uani 1 1 d . . . . .
C14 C -0.0937(3) 0.0307(2) 0.72364(14) 0.0451(5) Uani 1 1 d . . . . .
H14 H -0.060434 0.011857 0.793302 0.054 Uiso 1 1 calc R U . . .
C15 C -0.2632(3) -0.0768(2) 0.65999(18) 0.0548(5) Uani 1 1 d . . . . .
H15 H -0.345640 -0.166173 0.687412 0.066 Uiso 1 1 calc R U . . .
C16 C -0.3104(3) -0.0520(2) 0.55646(17) 0.0598(6) Uani 1 1 d . . . . .
H16 H -0.424468 -0.125459 0.513444 0.072 Uiso 1 1 calc R U . . .
C17 C -0.1911(3) 0.0798(2) 0.51564(16) 0.0574(6) Uani 1 1 d . . . . .
H17 H -0.223373 0.094828 0.444749 0.069 Uiso 1 1 calc R U . . .
C18 C -0.0238(3) 0.1898(2) 0.57921(13) 0.0463(5) Uani 1 1 d . . . . .
H18 H 0.055690 0.280417 0.551534 0.056 Uiso 1 1 calc R U . . .
C19 C 0.8441(3) 0.2046(2) 0.97615(14) 0.0478(5) Uani 1 1 d . . . . .
C20 C 0.9851(3) 0.1964(2) 1.01711(16) 0.0582(6) Uani 1 1 d . . . . .
H20 H 1.097085 0.189790 1.049626 0.070 Uiso 1 1 calc R U . . .
 
loop_
 _atom_site_aniso_label
 _atom_site_aniso_U_11
 _atom_site_aniso_U_22
 _atom_site_aniso_U_33
 _atom_site_aniso_U_23
 _atom_site_aniso_U_13
 _atom_site_aniso_U_12
C1 0.0332(10) 0.0336(9) 0.0464(9) 0.0060(7) 0.0036(8) 0.0115(8)
O1 0.0403(8) 0.0314(7) 0.0724(8) 0.0040(6) -0.0061(7) 0.0089(6)
C2 0.0310(10) 0.0345(9) 0.0468(9) 0.0092(7) 0.0029(8) 0.0110(8)
C3 0.0310(10) 0.0352(9) 0.0398(8) 0.0072(7) 0.0055(7) 0.0107(7)
C4 0.0341(10) 0.0348(9) 0.0427(9) 0.0087(7) 0.0048(8) 0.0115(8)
C5 0.0360(11) 0.0327(9) 0.0555(10) 0.0070(8) -0.0008(8) 0.0092(8)
C6 0.0442(12) 0.0349(9) 0.0555(10) 0.0104(8) 0.0008(9) 0.0174(9)
C7 0.0391(11) 0.0390(10) 0.0460(9) 0.0093(8) 0.0015(8) 0.0158(8)
C8 0.0347(10) 0.0351(9) 0.0497(10) 0.0047(7) -0.0025(8) 0.0102(8)
C9 0.0359(10) 0.0318(9) 0.0440(9) 0.0061(7) 0.0016(8) 0.0123(8)
C10 0.0336(10) 0.0311(9) 0.0542(10) 0.0078(8) 0.0016(8) 0.0092(8)
O2 0.0443(9) 0.0598(9) 0.1345(13) 0.0557(9) 0.0106(9) 0.0165(8)
O3 0.0349(8) 0.0470(8) 0.0866(9) 0.0256(7) 0.0128(7) 0.0190(6)
C11 0.0433(12) 0.0534(12) 0.0838(14) 0.0137(10) 0.0026(11) 0.0289(10)
C12 0.0659(17) 0.0724(16) 0.0744(14) 0.0009(12) -0.0076(12) 0.0334(13)
C13 0.0314(10) 0.0295(8) 0.0473(9) 0.0047(7) 0.0025(8) 0.0122(7)
C14 0.0371(11) 0.0402(10) 0.0569(10) 0.0126(8) 0.0046(9) 0.0133(9)
C15 0.0335(11) 0.0356(10) 0.0888(14) 0.0075(10) 0.0064(10) 0.0077(9)
C16 0.0401(12) 0.0449(12) 0.0834(14) -0.0082(10) -0.0167(11) 0.0161(10)
C17 0.0586(15) 0.0519(12) 0.0565(11) -0.0005(9) -0.0125(10) 0.0237(11)
C18 0.0472(12) 0.0402(10) 0.0505(10) 0.0077(8) 0.0033(9) 0.0171(9)
C19 0.0474(13) 0.0379(10) 0.0541(11) 0.0072(8) -0.0063(10) 0.0157(9)
C20 0.0521(14) 0.0471(12) 0.0705(13) 0.0072(10) -0.0160(11) 0.0210(10)
 
_geom_special_details
;
 All esds (except the esd in the dihedral angle between two l.s. planes)
 are estimated using the full covariance matrix.  The cell esds are taken
 into account individually in the estimation of esds in distances, angles
 and torsion angles; correlations between esds in cell parameters are only
 used when they are defined by crystal symmetry.  An approximate (isotropic)
 treatment of cell esds is used for estimating esds involving l.s. planes.
;
 
loop_
 _geom_bond_atom_site_label_1
 _geom_bond_atom_site_label_2
 _geom_bond_distance
 _geom_bond_site_symmetry_2
 _geom_bond_publ_flag
C1 O1 1.2170(19) . ?
C1 C2 1.485(2) . ?
C1 C9 1.495(2) . ?
C2 C3 1.360(2) . ?
C2 C10 1.476(2) . ?
C3 C13 1.464(2) . ?
C3 C4 1.487(2) . ?
C4 C5 1.381(2) . ?
C4 C9 1.397(2) . ?
C5 C6 1.386(2) . ?
C5 H5 0.9300 . ?
C6 C7 1.390(2) . ?
C6 H6 0.9300 . ?
C7 C8 1.403(2) . ?
C7 C19 1.440(2) . ?
C8 C9 1.357(2) . ?
C8 H8 0.9300 . ?
C10 O2 1.1956(19) . ?
C10 O3 1.316(2) . ?
O3 C11 1.448(2) . ?
C11 C12 1.486(3) . ?
C11 H11A 0.9700 . ?
C11 H11B 0.9700 . ?
C12 H12A 0.9600 . ?
C12 H12B 0.9600 . ?
C12 H12C 0.9600 . ?
C13 C14 1.388(2) . ?
C13 C18 1.391(2) . ?
C14 C15 1.376(2) . ?
C14 H14 0.9300 . ?
C15 C16 1.367(3) . ?
C15 H15 0.9300 . ?
C16 C17 1.367(3) . ?
C16 H16 0.9300 . ?
C17 C18 1.372(3) . ?
C17 H17 0.9300 . ?
C18 H18 0.9300 . ?
C19 C20 1.171(3) . ?
C20 H20 0.9300 . ?
 
loop_
 _geom_angle_atom_site_label_1
 _geom_angle_atom_site_label_2
 _geom_angle_atom_site_label_3
 _geom_angle
 _geom_angle_site_symmetry_1
 _geom_angle_site_symmetry_3
 _geom_angle_publ_flag
O1 C1 C2 127.45(15) . . ?
O1 C1 C9 127.15(16) . . ?
C2 C1 C9 105.39(14) . . ?
C3 C2 C10 128.71(16) . . ?
C3 C2 C1 109.65(14) . . ?
C10 C2 C1 121.64(14) . . ?
C2 C3 C13 127.78(15) . . ?
C2 C3 C4 108.65(15) . . ?
C13 C3 C4 123.46(14) . . ?
C5 C4 C9 119.88(16) . . ?
C5 C4 C3 131.30(16) . . ?
C9 C4 C3 108.72(14) . . ?
C4 C5 C6 118.61(17) . . ?
C4 C5 H5 120.7 . . ?
C6 C5 H5 120.7 . . ?
C5 C6 C7 121.33(16) . . ?
C5 C6 H6 119.3 . . ?
C7 C6 H6 119.3 . . ?
C6 C7 C8 119.58(16) . . ?
C6 C7 C19 120.33(16) . . ?
C8 C7 C19 120.05(16) . . ?
C9 C8 C7 118.69(16) . . ?
C9 C8 H8 120.7 . . ?
C7 C8 H8 120.7 . . ?
C8 C9 C4 121.91(16) . . ?
C8 C9 C1 130.41(16) . . ?
C4 C9 C1 107.59(15) . . ?
O2 C10 O3 124.00(16) . . ?
O2 C10 C2 123.78(17) . . ?
O3 C10 C2 112.21(14) . . ?
C10 O3 C11 118.36(14) . . ?
O3 C11 C12 108.80(16) . . ?
O3 C11 H11A 109.9 . . ?
C12 C11 H11A 109.9 . . ?
O3 C11 H11B 109.9 . . ?
C12 C11 H11B 109.9 . . ?
H11A C11 H11B 108.3 . . ?
C11 C12 H12A 109.5 . . ?
C11 C12 H12B 109.5 . . ?
H12A C12 H12B 109.5 . . ?
C11 C12 H12C 109.5 . . ?
H12A C12 H12C 109.5 . . ?
H12B C12 H12C 109.5 . . ?
C14 C13 C18 118.34(16) . . ?
C14 C13 C3 121.35(14) . . ?
C18 C13 C3 120.30(15) . . ?
C15 C14 C13 120.52(17) . . ?
C15 C14 H14 119.7 . . ?
C13 C14 H14 119.7 . . ?
C16 C15 C14 119.96(19) . . ?
C16 C15 H15 120.0 . . ?
C14 C15 H15 120.0 . . ?
C15 C16 C17 120.53(19) . . ?
C15 C16 H16 119.7 . . ?
C17 C16 H16 119.7 . . ?
C16 C17 C18 120.03(18) . . ?
C16 C17 H17 120.0 . . ?
C18 C17 H17 120.0 . . ?
C17 C18 C13 120.59(18) . . ?
C17 C18 H18 119.7 . . ?
C13 C18 H18 119.7 . . ?
C20 C19 C7 177.7(2) . . ?
C19 C20 H20 180.0 . . ?
 
loop_
 _geom_torsion_atom_site_label_1
 _geom_torsion_atom_site_label_2
 _geom_torsion_atom_site_label_3
 _geom_torsion_atom_site_label_4
 _geom_torsion
 _geom_torsion_site_symmetry_1
 _geom_torsion_site_symmetry_2
 _geom_torsion_site_symmetry_3
 _geom_torsion_site_symmetry_4
 _geom_torsion_publ_flag
O1 C1 C2 C3 178.33(18) . . . . ?
C9 C1 C2 C3 -0.60(19) . . . . ?
O1 C1 C2 C10 -0.5(3) . . . . ?
C9 C1 C2 C10 -179.44(15) . . . . ?
C10 C2 C3 C13 3.0(3) . . . . ?
C1 C2 C3 C13 -175.68(16) . . . . ?
C10 C2 C3 C4 179.28(16) . . . . ?
C1 C2 C3 C4 0.55(19) . . . . ?
C2 C3 C4 C5 -176.55(18) . . . . ?
C13 C3 C4 C5 -0.1(3) . . . . ?
C2 C3 C4 C9 -0.28(19) . . . . ?
C13 C3 C4 C9 176.15(15) . . . . ?
C9 C4 C5 C6 0.4(3) . . . . ?
C3 C4 C5 C6 176.28(16) . . . . ?
C4 C5 C6 C7 -0.4(3) . . . . ?
C5 C6 C7 C8 0.3(3) . . . . ?
C5 C6 C7 C19 -177.46(17) . . . . ?
C6 C7 C8 C9 -0.1(3) . . . . ?
C19 C7 C8 C9 177.65(17) . . . . ?
C7 C8 C9 C4 0.0(3) . . . . ?
C7 C8 C9 C1 -176.00(16) . . . . ?
C5 C4 C9 C8 -0.2(3) . . . . ?
C3 C4 C9 C8 -176.95(15) . . . . ?
C5 C4 C9 C1 176.66(15) . . . . ?
C3 C4 C9 C1 -0.10(19) . . . . ?
O1 C1 C9 C8 -2.0(3) . . . . ?
C2 C1 C9 C8 176.90(18) . . . . ?
O1 C1 C9 C4 -178.52(18) . . . . ?
C2 C1 C9 C4 0.42(18) . . . . ?
C3 C2 C10 O2 -139.5(2) . . . . ?
C1 C2 C10 O2 39.1(3) . . . . ?
C3 C2 C10 O3 41.2(3) . . . . ?
C1 C2 C10 O3 -140.19(17) . . . . ?
O2 C10 O3 C11 3.0(3) . . . . ?
C2 C10 O3 C11 -177.67(14) . . . . ?
C10 O3 C11 C12 128.86(19) . . . . ?
C2 C3 C13 C14 -133.53(19) . . . . ?
C4 C3 C13 C14 50.7(2) . . . . ?
C2 C3 C13 C18 46.1(3) . . . . ?
C4 C3 C13 C18 -129.60(18) . . . . ?
C18 C13 C14 C15 -1.5(3) . . . . ?
C3 C13 C14 C15 178.19(17) . . . . ?
C13 C14 C15 C16 1.7(3) . . . . ?
C14 C15 C16 C17 -0.6(3) . . . . ?
C15 C16 C17 C18 -0.9(3) . . . . ?
C16 C17 C18 C13 1.2(3) . . . . ?
C14 C13 C18 C17 0.0(3) . . . . ?
C3 C13 C18 C17 -179.65(17) . . . . ?
 
_refine_diff_density_max    0.176
_refine_diff_density_min   -0.190
_refine_diff_density_rms    0.043
